# Supplementary material for: Structural characterization and QSAR modeling of 1,2,4-triazole derivatives as α-glucosidase inhibitors
Source: Royal Society of Chemistry journal article supplement (doi:10.1039/d0nj05298a), 2020-12-08
Supplement: d0nj05298a1.pdf [file d0nj05298a1.pdf]

## Supporting Information

### Structural characterization and QSAR modeling of 1,2,4-triazole derivatives as $\alpha$ -glucosidase inhibitors

Rahma Dahmani <sup>a</sup>, Marwa Manachou <sup>b</sup>, Salah Belaidi <sup>c§</sup>, Samir Chtita <sup>d§</sup> and Salima Boughdiri <sup>b</sup>

<sup>a</sup> Université de Tunis El Manar, Faculté des Sciences de Tunis, Laboratoire de Spectroscopie Atomique, Moléculaire et Applications - LSAMA, 2092, Tunis, Tunisie.

<sup>b</sup> University of Tunis El Manar, Faculty of Sciences of Tunis, Department of Chemistry, Research Laboratory Characterization, Applications and Modeling of Materials, LCAMM, 2092, Tunis, Tunisia.

<sup>c</sup> University of Biskra, Faculty of Sciences, Department of Chemistry, Group of Computational and Pharmaceutical Chemistry, LMCE Laboratory, 07000, Biskra, Algeria.

<sup>d</sup> University of Casablanca, Faculty of sciences Ben M'Sik, Hassan II, Laboratory of physical chemistry of materials, B.P. 7955 Sidi Othmane, Casablanca, Morocco.

<sup>§</sup> Corresponding authors.

E-mail addresses: [prof.belaidi@gmail.com](mailto:prof.belaidi@gmail.com) (S. Belaidi), [samirchtita@gmail.com](mailto:samirchtita@gmail.com) (S. Chtita)

**Table S1.** Measured and calculated geometric parameters (distances in angstroms and angles in degrees) of 1,2,4-triazole at different levels of theory with 6-311++G(d,p) basis set.

| Parameter   | 1H-1,2,4-Triazole     |             |                 |             |                  |             |                    |                    |                      |
|-------------|-----------------------|-------------|-----------------|-------------|------------------|-------------|--------------------|--------------------|----------------------|
|             | Exp <sup>Ref 20</sup> | HF          | HF <sup>a</sup> | MP2         | MP2 <sup>a</sup> | B3LYP       | B3LYP <sup>a</sup> | B3LYP <sup>b</sup> | B3LYP <sup>a,b</sup> |
| N1N2        | 1.381                 | 1.339       | 3.04            | 1.347       | 2.46             | 1.356       | 1.81               | 1.358              | 1.67                 |
| N2C3        | 1.328                 | 1.292       | 2.71            | 1.389       | -4.59            | 1.321       | 0.53               | 1.325              | 0.23                 |
| C3N4        | 1.354                 | 1.356       | -0.15           | 1.362       | -0.59            | 1.364       | -0.74              | 1.365              | -0.81                |
| N4C5        | 1.280                 | 1.296       | -1.25           | 1.329       | -3.83            | 1.318       | -2.97              | 1.321              | -3.20                |
| C5N1        | 1.375                 | 1.330       | 3.27            | 1.356       | 1.38             | 1.350       | 1.82               | 1.351              | 1.75                 |
| N1H6        | 0.998                 | 0.992       | 0.60            | 1.010       | -1.20            | 1.008       | -1.00              | 1.010              | -1.20                |
| C3H7        | 1.078                 | 1.070       | 0.74            | 1.080       | -0.19            | 1.079       | -0.09              | 1.081              | -0.28                |
| C5H8        | 1.078                 | 1.071       | 0.65            | 1.080       | -0.19            | 1.079       | -0.09              | 1.081              | -0.28                |
| N1N2C3      | 102.7                 | 102.6       | 0.10            | 101.6       | 1.07             | 102.0       | 0.68               | 101.6              | 1.07                 |
| N2C3N4      | 113.0                 | 114.7       | -1.50           | 115.3       | -2.04            | 115.1       | -1.86              | 115.6              | -2.30                |
| C3N4C5      | 106.8                 | 102.7       | 3.84            | 102.6       | 3.93             | 102.9       | 3.65               | 102.5              | 4.03                 |
| N4C5N1      | 109.0                 | 110.2       | -1.10           | 109.6       | -0.55            | 109.8       | -0.73              | 109.9              | -0.83                |
| C5N1N2      | 108.5                 | 109.7       | -1.11           | 110.9       | -2.21            | 110.3       | -1.66              | 110.4              | -1.75                |
| C5N1H6      | 124.0                 | 129.5       | -4.44           | 129.3       | -4.27            | 129.7       | -4.60              | 129.8              | -4.68                |
| N4C3H7      | 118.5                 | 123.1       | -3.88           | 123.5       | -4.22            | 123.2       | -3.97              | 123.0              | -3.80                |
| N4C5H8      | 120.5                 | 126.4       | -4.90           | 126.9       | -5.31            | 126.6       | -5.06              | 126.6              | -5.06                |
| <b>RMSE</b> | ---                   | <b>2.61</b> | ---             | <b>2.79</b> | ---              | <b>2.69</b> | ---                | <b>2.76</b>        | ---                  |

<sup>a</sup> Percentage deviation to the experimental values, <sup>b</sup> b3lyp/6-31G(d).

**Table S1. (continued).**

| Parameter   | 1H-1,2,4-Triazole     |             |                    |             |                  |             |                      |
|-------------|-----------------------|-------------|--------------------|-------------|------------------|-------------|----------------------|
|             | Exp <sup>Ref 20</sup> | M062X       | M062X <sup>a</sup> | PBE         | PBE <sup>a</sup> | wB97X-D     | wB97X-D <sup>a</sup> |
| N1N2        | 1.381                 | 1.345       | 2.61               | 1.359       | 1.59             | 1.347       | 2.46                 |
| N2C3        | 1.328                 | 1.316       | 0.90               | 1.334       | -0.45            | 1.316       | 0.90                 |
| C3N4        | 1.354                 | 1.360       | -0.44              | 1.368       | -1.03            | 1.359       | -0.37                |
| N4C5        | 1.280                 | 1.313       | -2.58              | 1.328       | -3.75            | 1.314       | -2.66                |
| C5N1        | 1.375                 | 1.345       | 2.18               | 1.358       | 1.24             | 1.344       | 2.25                 |
| N1H6        | 0.998                 | 1.008       | -1.00              | 1.016       | -1.80            | 1.006       | -0.80                |
| C3H7        | 1.078                 | 1.078       | 0                  | 1.087       | -0.83            | 1.079       | -0.09                |
| C5H8        | 1.078                 | 1.079       | -0.09              | 1.087       | -0.83            | 1.079       | -0.09                |
| N1N2C3      | 102.7                 | 102.2       | 0.49               | 101.6       | 1.07             | 102.1       | 0.58                 |
| N2C3N4      | 113.0                 | 115.0       | -1.77              | 115.5       | -2.21            | 115.1       | -1.86                |
| C3N4C5      | 106.8                 | 102.7       | 3.84               | 102.6       | 3.93             | 102.7       | 3.84                 |
| N4C5N1      | 109.0                 | 109.8       | -0.73              | 109.8       | -0.73            | 109.9       | -0.83                |
| C5N1N2      | 108.5                 | 110.3       | -1.66              | 110.6       | -1.94            | 110.3       | -1.66                |
| C5N1H6      | 124.0                 | 129.6       | -4.51              | 129.7       | -4.60            | 129.5       | -4.44                |
| N4C3H7      | 118.5                 | 123.3       | -4.05              | 123.2       | -3.97            | 123.2       | -3.97                |
| N4C5H8      | 120.5                 | 126.7       | -5.15              | 126.7       | -5.15            | 126.6       | -5.06                |
| <b>RMSE</b> | ---                   | <b>2.71</b> | ---                | <b>2.77</b> | ---              | <b>2.68</b> | ---                  |

<sup>a</sup> Percentage deviation to the experimental values.

**Table S2.** Vibrational anharmonic frequencies ( $\omega_i$ , in  $\text{cm}^{-1}$ ) and IR intensities ( $I$ ,  $\text{km}\cdot\text{mol}^{-1}$ ) for the intermonomer modes of Triazole.

| Triazole | E(harm)  | E(anharm) | I(harm)     | I(anharm)   |
|----------|----------|-----------|-------------|-------------|
| 1(1)     | 3651.186 | 3491.641  | 83.67336522 | 66.72535495 |
| 2(1)     | 3257.644 | 3123.478  | 1.56825484  | 1.33076375  |
| 3(1)     | 3251.412 | 3127.014  | 1.50646222  | 4.40657135  |
| 4(1)     | 1549.867 | 1516.545  | 26.91523871 | 18.81451114 |
| 5(1)     | 1461.345 | 1419.574  | 22.59667061 | 20.92620383 |
| 6(1)     | 1386.497 | 1352.772  | 12.12631708 | 9.26731105  |
| 7(1)     | 1317.57  | 1283.942  | 21.76718097 | 19.88554548 |
| 8(1)     | 1274.682 | 1250.259  | 0.55555647  | 0.97769202  |
| 9(1)     | 1179.49  | 1152.651  | 14.37514305 | 17.13347353 |
| 10(1)    | 1137.716 | 1108.053  | 17.64308814 | 13.58315574 |
| 11(1)    | 1077.598 | 1044.571  | 41.58957083 | 38.95235694 |
| 12(1)    | 990.852  | 976.192   | 16.41651127 | 17.71533564 |
| 13(1)    | 962.419  | 949.174   | 5.49745449  | 4.38477947  |
| 14(1)    | 896.755  | 889.887   | 12.50193596 | 6.54686684  |
| 15(1)    | 842.593  | 860.238   | 19.02601397 | 24.03588605 |
| 16(1)    | 695.907  | 685.647   | 45.83334822 | 42.19468258 |
| 17(1)    | 676.879  | 663.364   | 3.7336616   | 1.82364638  |
| 18(1)    | 552.343  | 559.733   | 77.44287832 | 80.37530966 |

**Table S3.** Vibrational anharmonic frequencies ( $\omega_i$ , in  $\text{cm}^{-1}$ ) and IR intensities ( $I$ ,  $\text{km}\cdot\text{mol}^{-1}$ ) for the intermonomer modes of Triazolone.

| Triazolone | E(harm)  | E(anharm) | I(harm)      | I(anharm)    |
|------------|----------|-----------|--------------|--------------|
| 1(1)       | 3683.949 | 3496.506  | 93.12790776  | 71.31022108  |
| 2(1)       | 3674.701 | 3492.136  | 101.00420844 | 92.55413968  |
| 3(1)       | 3259.561 | 3166.343  | 0.32157497   | 0.54067708   |
| 4(1)       | 1819.952 | 1777.969  | 782.12544339 | 633.36579315 |
| 5(1)       | 1609.299 | 1574.676  | 39.90169477  | 31.09959868  |
| 6(1)       | 1417.277 | 1375.317  | 32.77325077  | 34.23187645  |
| 7(1)       | 1388.62  | 1349.966  | 3.93891726   | 6.05356713   |
| 8(1)       | 1322.68  | 1299.142  | 16.32553273  | 13.79243232  |
| 9(1)       | 1214.014 | 1186.166  | 34.21406484  | 29.94823344  |
| 10(1)      | 1115.328 | 1090.111  | 2.23297066   | 2.29754143   |
| 11(1)      | 1055.031 | 1022.981  | 25.33410167  | 19.08997371  |
| 12(1)      | 999.799  | 993.728   | 24.88099437  | 24.21043119  |
| 13(1)      | 928.014  | 912.252   | 28.60761003  | 37.36177748  |
| 14(1)      | 828.67   | 832.297   | 21.12038066  | 17.69877553  |
| 15(1)      | 748.193  | 737.696   | 8.52070266   | 9.19248177   |
| 16(1)      | 743.134  | 735.435   | 6.57326732   | 6.60678857   |
| 17(1)      | 661.524  | 646.638   | 8.26225245   | 10.33399102  |
| 18(1)      | 508.367  | 483.975   | 224.49612848 | 201.28263541 |
| 19(1)      | 481.724  | 478.433   | 8.33478612   | 7.00889224   |
| 20(1)      | 436.936  | 422.561   | 4.48032683   | 15.04093022  |
| 21(1)      | 222.849  | 230.636   | 8.29480458   | 6.73151917   |

**Table S4.** Second-order perturbation analysis of the interaction between electron donor and electron acceptor orbitals within the triazole and triazolone molecules,  $E_2$  (in kcal.mol<sup>-1</sup>) is the hyperconjugative interaction energy deduced from the second-order perturbation energies,  $F_{i,j}$  is the Fock matrix element,  $F_{i,j} = \langle \Phi_i | \hat{F} | \Phi_j \rangle$ .  $\Delta E_{ij}$  ( $= E_j - E_i$ ) is the energy difference between donor and acceptor orbitals. These calculations are done using B3LYP/6-31G(d). Numbering of atoms is given in Figure 1 of the ms .

| Donor (i) → Acceptor (j)        | 1H-1,2,4-triazole |                 |           |
|---------------------------------|-------------------|-----------------|-----------|
|                                 | $E_2$             | $\Delta E_{ij}$ | $F_{i,j}$ |
| BD (2) N2 - C3 → BD*(2) C5 - N4 | 10.87             | 0.31            | 0.056     |
| BD (2) C5 - N4 → BD*(2) N2 - C3 | 30.51             | 0.31            | 0.091     |
| LP (1) N1 → BD*(2) N2 - C3      | 26.05             | 0.29            | 0.079     |
| LP (1) N1 → BD*(2) C5 - N4      | 52.13             | 0.28            | 0.110     |
| 1H-1,2,4-triazolone             |                   |                 |           |
| LP (1) N1 → BD*(2) N2 - C3      | 26.93             | 0.27            | 0.077     |
| LP (1) N1 → BD*(1) C5 - O6      | 59.57             | 0.28            | 0.119     |
| LP (1) N4 → BD*(2) N2 - C3      | 46.53             | 0.27            | 0.102     |
| LP (1) N4 → BD*(1) C5 - O6      | 51.22             | 0.29            | 0.111     |
| LP (1) O6 → RV*(1) C5           | 15.95             | 1.41            | 0.134     |
| LP (2) O6 → BD*(1) N1 - C5      | 27.91             | 0.66            | 0.124     |
| LP (2) O6 → BD*(1) N4 - C5      | 29.92             | 0.63            | 0.125     |

BD is the 2-center bond. BD\* is the 2-center antibond. LP is the 1-center valence lone pair

**Table S5.** The Cartesian coordinates (X, Y, Z) in Angstrom) of TzO derivatives: The first column corresponds to the number of the atom in the structure (CN: Center Number) and the second one to its atomic number (AN: Atomic Number).

| N  | CN | AN        | X         | Y         | Z |
|----|----|-----------|-----------|-----------|---|
| 1  | 7  | -0.545124 | 3.557776  | 0.075244  |   |
| 2  | 7  | 0.518616  | 3.032032  | -0.621268 |   |
| 3  | 6  | 0.273621  | 1.759214  | -0.692426 |   |
| 4  | 7  | -0.925955 | 1.435493  | -0.067553 |   |
| 5  | 6  | -1.495539 | 2.63152   | 0.429441  |   |
| 6  | 8  | -2.549956 | 2.780497  | 1.011114  |   |
| 7  | 6  | -1.561588 | 0.160683  | 0.032446  |   |
| 8  | 6  | -2.80211  | -0.035464 | -0.576502 |   |
| 9  | 6  | -3.441863 | -1.266158 | -0.473236 |   |
| 10 | 6  | -2.818054 | -2.281127 | 0.236383  |   |
| 11 | 6  | -1.589803 | -2.109309 | 0.854574  |   |
| 12 | 6  | -0.964333 | -0.869235 | 0.759182  |   |
| 13 | 9  | -3.433792 | -3.482343 | 0.332407  |   |
| 14 | 6  | 1.171465  | 0.783361  | -1.383454 |   |
| 15 | 6  | 2.167167  | 0.077277  | -0.474239 |   |
| 16 | 6  | 2.493928  | -1.260639 | -0.681576 |   |
| 17 | 6  | 3.414293  | -1.94823  | 0.093803  |   |
| 18 | 6  | 4.05251   | -1.270737 | 1.129772  |   |
| 19 | 6  | 3.760305  | 0.072032  | 1.365228  |   |
| 20 | 6  | 2.828898  | 0.734394  | 0.568789  |   |
| 21 | 9  | 1.882531  | -1.932667 | -1.693429 |   |
| 22 | 1  | -0.614733 | 4.549721  | 0.22853   |   |
| 23 | 1  | -3.2684   | 0.777169  | -1.118594 |   |
| 24 | 1  | -4.406003 | -1.442673 | -0.932695 |   |
| 25 | 1  | -1.144159 | -2.92623  | 1.407474  |   |
| 26 | 1  | -0.015701 | -0.701795 | 1.253098  |   |
| 27 | 1  | 0.567877  | 0.041337  | -1.90869  |   |
| 28 | 1  | 1.718543  | 1.347453  | -2.144465 |   |
| 29 | 1  | 3.6179    | -2.989748 | -0.122078 |   |
| 30 | 1  | 4.775939  | -1.791195 | 1.74625   |   |
| 31 | 1  | 4.25787   | 0.604664  | 2.166986  |   |
| 32 | 1  | 2.605729  | 1.779819  | 0.750383  |   |

  

| N  | CN | AN        | X         | Y         | Z |
|----|----|-----------|-----------|-----------|---|
| 1  | 7  | 1.48156   | -3.328056 | -0.333194 |   |
| 2  | 7  | 0.383793  | -3.005657 | -1.097314 |   |
| 3  | 6  | 0.237929  | -1.724555 | -0.942436 |   |
| 4  | 7  | 1.207525  | -1.197539 | -0.098377 |   |
| 5  | 6  | 2.043261  | -2.258044 | 0.321754  |   |
| 6  | 8  | 3.003289  | -2.218587 | 1.062867  |   |
| 7  | 6  | 1.39311   | 0.164602  | 0.29421   |   |
| 8  | 6  | 1.67872   | 1.130687  | -0.668841 |   |
| 9  | 6  | 1.765705  | 2.806468  | 1.046098  |   |
| 10 | 6  | 1.312393  | 0.508066  | 1.64239   |   |
| 11 | 6  | 1.85349   | 2.469948  | -0.307887 |   |
| 12 | 6  | 1.505543  | 1.835064  | 2.010996  |   |
| 13 | 6  | 2.116434  | 3.519473  | -1.360077 |   |
| 14 | 6  | -0.882242 | -0.949257 | -1.55999  |   |
| 15 | 6  | -1.922435 | -0.474333 | -0.557432 |   |
| 16 | 6  | -2.404272 | 0.831101  | -0.576613 |   |
| 17 | 6  | -3.369561 | 1.298362  | 0.302053  |   |
| 18 | 6  | -3.888823 | 0.422228  | 1.250764  |   |
| 19 | 6  | -3.436944 | -0.896276 | 1.300436  |   |
| 20 | 6  | -2.465438 | -1.33351  | 0.404587  |   |
| 21 | 9  | -1.914336 | 1.698503  | -1.503922 |   |
| 22 | 1  | 1.817094  | -4.275587 | -0.293994 |   |
| 23 | 1  | 1.777765  | 0.83376   | -1.707397 |   |
| 24 | 1  | 1.910771  | 3.837984  | 1.349844  |   |
| 25 | 1  | 1.114276  | -0.255502 | 2.383241  |   |
| 26 | 1  | 1.452909  | 2.113578  | 3.057256  |   |
| 27 | 1  | 1.177651  | 3.874388  | -1.798657 |   |
| 28 | 1  | 2.631897  | 4.384661  | -0.938121 |   |
| 29 | 1  | 2.728799  | 3.123708  | -2.17392  |   |
| 30 | 1  | -0.494156 | -0.093701 | -2.113021 |   |
| 31 | 1  | -1.348961 | -1.618472 | -2.287904 |   |
| 32 | 1  | -3.696909 | 2.328267  | 0.232492  |   |
| 33 | 1  | -4.643931 | 0.769799  | 1.946022  |   |
| 34 | 1  | -3.84078  | -1.58267  | 2.03525   |   |
| 35 | 1  | -2.11509  | -2.359406 | 0.443408  |   |

| N | CN | AN | X         | Y         | Z         |
|---|----|----|-----------|-----------|-----------|
|   | 1  | 7  | -1.747726 | -3.643616 | 0.641944  |
|   | 2  | 7  | -2.459946 | -2.919341 | -0.288318 |
|   | 3  | 6  | -1.655888 | -1.96555  | -0.648374 |
|   | 4  | 7  | -0.437293 | -2.047287 | 0.012181  |
|   | 5  | 6  | -0.480862 | -3.164026 | 0.876225  |
|   | 6  | 8  | 0.383865  | -3.579668 | 1.619923  |
|   | 7  | 6  | -2.031334 | -0.885432 | -1.613117 |
|   | 8  | 6  | -2.370225 | 0.441548  | -0.946509 |
|   | 9  | 6  | -1.668669 | 1.605372  | -1.26748  |
|   | 10 | 6  | -1.991467 | 2.827714  | -0.678954 |
|   | 11 | 6  | -3.027761 | 2.863567  | 0.237878  |
|   | 12 | 6  | -3.747599 | 1.730076  | 0.584943  |
|   | 13 | 6  | -3.410512 | 0.519486  | -0.013755 |
|   | 14 | 9  | -3.350928 | 4.046486  | 0.817639  |
|   | 15 | 6  | 0.710669  | -1.210396 | -0.150453 |
|   | 16 | 6  | 1.010979  | -0.25107  | 0.817575  |
|   | 17 | 6  | 2.128201  | 0.560802  | 0.68567   |
|   | 18 | 6  | 2.963205  | 0.422056  | -0.446746 |
|   | 19 | 6  | 2.662777  | -0.550163 | -1.402171 |
| 3 | 20 | 6  | 1.543011  | -1.369002 | -1.250763 |
|   | 21 | 8  | 4.01886   | 1.277161  | -0.521943 |
|   | 22 | 6  | 4.877553  | 1.204358  | -1.65465  |
|   | 23 | 8  | 2.343813  | 1.536726  | 1.620346  |
|   | 24 | 6  | 3.504586  | 1.381242  | 2.450366  |
|   | 25 | 1  | -2.14843  | -4.46208  | 1.06783   |
|   | 26 | 1  | -1.222493 | -0.734072 | -2.332015 |
|   | 27 | 1  | -2.896254 | -1.256417 | -2.168989 |
|   | 28 | 1  | -0.85362  | 1.562752  | -1.98172  |
|   | 29 | 1  | -1.449627 | 3.734253  | -0.917661 |
|   | 30 | 1  | -4.552112 | 1.802793  | 1.306216  |
|   | 31 | 1  | -3.9619   | -0.376943 | 0.248651  |
|   | 32 | 1  | 0.375678  | -0.121022 | 1.684354  |
|   | 33 | 1  | 3.296462  | -0.681092 | -2.268665 |
|   | 34 | 1  | 1.328367  | -2.134914 | -1.986417 |
|   | 35 | 1  | 5.625103  | 1.982016  | -1.5089   |
|   | 36 | 1  | 5.373563  | 0.230164  | -1.717647 |
|   | 37 | 1  | 4.328696  | 1.397964  | -2.582105 |
|   | 38 | 1  | 3.484806  | 2.216987  | 3.148557  |
|   | 39 | 1  | 3.451571  | 0.439278  | 3.005949  |
|   | 40 | 1  | 4.421003  | 1.416418  | 1.858445  |

| N | CN | AN | X         | Y         | Z         |
|---|----|----|-----------|-----------|-----------|
|   | 1  | 7  | -0.13867  | -2.863028 | 0.648484  |
|   | 2  | 7  | 0.787228  | -1.848167 | 0.568208  |
|   | 3  | 6  | 0.096273  | -0.793002 | 0.269577  |
|   | 4  | 7  | -1.258431 | -1.087073 | 0.144737  |
|   | 5  | 6  | -1.426707 | -2.472429 | 0.375974  |
|   | 6  | 8  | -2.448616 | -3.126607 | 0.340891  |
|   | 7  | 6  | -2.328585 | -0.200343 | -0.185201 |
|   | 8  | 6  | -2.645522 | 0.856713  | 0.668118  |
|   | 9  | 6  | -4.420246 | 1.512232  | -0.809041 |
|   | 10 | 6  | -3.067708 | -0.4181   | -1.346418 |
|   | 11 | 6  | -3.687851 | 1.735959  | 0.361677  |
|   | 12 | 6  | -4.117724 | 0.44351   | -1.649646 |
|   | 13 | 6  | -4.007134 | 2.899166  | 1.269603  |
|   | 14 | 6  | 0.667524  | 0.579107  | 0.051552  |
|   | 15 | 6  | 2.178203  | 0.601502  | -0.038968 |
|   | 16 | 6  | 2.959968  | 0.805259  | 1.100364  |
|   | 17 | 6  | 4.351084  | 0.82165   | 1.026494  |
| 4 | 18 | 6  | 4.947726  | 0.630954  | -0.208799 |
|   | 19 | 6  | 4.20853   | 0.4286    | -1.363157 |
|   | 20 | 6  | 2.819378  | 0.415519  | -1.266555 |
|   | 21 | 9  | 6.301727  | 0.647872  | -0.292674 |
|   | 22 | 1  | 0.155316  | -3.805813 | 0.84021   |
|   | 23 | 1  | -2.085805 | 0.982326  | 1.588598  |
|   | 24 | 1  | -5.242307 | 2.175048  | -1.058443 |
|   | 25 | 1  | -2.832228 | -1.258948 | -1.986062 |
|   | 26 | 1  | -4.704956 | 0.278073  | -2.545597 |
|   | 27 | 1  | -3.729325 | 2.685928  | 2.304212  |
|   | 28 | 1  | -3.463089 | 3.798559  | 0.961121  |
|   | 29 | 1  | -5.07258  | 3.138439  | 1.247568  |
|   | 30 | 1  | 0.228044  | 0.990768  | -0.863011 |
|   | 31 | 1  | 0.335367  | 1.237727  | 0.860724  |
|   | 32 | 1  | 2.480943  | 0.949025  | 2.062863  |
|   | 33 | 1  | 4.965569  | 0.978557  | 1.90411   |
|   | 34 | 1  | 4.714667  | 0.287007  | -2.30987  |
|   | 35 | 1  | 2.229623  | 0.255418  | -2.162931 |

| N | CN | AN | X         | Y         | Z         |
|---|----|----|-----------|-----------|-----------|
|   | 1  | 7  | 2.889553  | -2.298106 | -0.394716 |
|   | 2  | 7  | 1.715618  | -2.490391 | -1.090054 |
|   | 3  | 6  | 1.028268  | -1.408284 | -0.891872 |
|   | 4  | 7  | 1.719362  | -0.51192  | -0.080689 |
|   | 5  | 6  | 2.964324  | -1.09384  | 0.258184  |
|   | 6  | 8  | 3.849345  | -0.631925 | 0.948408  |
|   | 7  | 6  | -0.349353 | -1.184955 | -1.423304 |
|   | 8  | 6  | -1.430629 | -1.214836 | -0.351221 |
|   | 9  | 6  | -2.470404 | -0.26514  | -0.358988 |
|   | 10 | 6  | -3.472784 | -0.307804 | 0.614031  |
|   | 11 | 6  | -3.449941 | -1.299152 | 1.595052  |
|   | 12 | 6  | -2.435153 | -2.248873 | 1.610458  |
|   | 13 | 6  | -1.437236 | -2.196819 | 0.637366  |
|   | 14 | 8  | -2.427458 | 0.666044  | -1.359966 |
|   | 15 | 6  | -3.436139 | 1.666132  | -1.413012 |
|   | 16 | 6  | 1.330719  | 0.789332  | 0.33355   |
|   | 17 | 6  | 1.187524  | 1.821085  | -0.59318  |
| 5 | 18 | 6  | 0.83632   | 3.106305  | -0.2151   |
|   | 19 | 6  | 0.640854  | 3.377952  | 1.136809  |
|   | 20 | 6  | 0.795499  | 2.368101  | 2.085725  |
|   | 21 | 6  | 1.13728   | 1.080973  | 1.6843    |
|   | 22 | 9  | 1.402146  | 1.56048   | -1.902874 |
|   | 23 | 1  | 3.611297  | -2.998618 | -0.40715  |
|   | 24 | 1  | -0.391422 | -0.238386 | -1.961699 |
|   | 25 | 1  | -0.527865 | -1.976267 | -2.157059 |
|   | 26 | 1  | -4.27102  | 0.421877  | 0.613572  |
|   | 27 | 1  | -4.234024 | -1.3225   | 2.343531  |
|   | 28 | 1  | -2.417232 | -3.023454 | 2.367878  |
|   | 29 | 1  | -0.642531 | -2.935602 | 0.64082   |
|   | 30 | 1  | -3.191138 | 2.288728  | -2.272019 |
|   | 31 | 1  | -4.428261 | 1.225226  | -1.556868 |
|   | 32 | 1  | -3.43664  | 2.280841  | -0.506715 |
|   | 33 | 1  | 0.736009  | 3.871285  | -0.974864 |
|   | 34 | 1  | 0.373802  | 4.381488  | 1.446615  |
|   | 35 | 1  | 0.651547  | 2.581703  | 3.137754  |
|   | 36 | 1  | 1.266448  | 0.288261  | 2.409949  |

| N | CN | AN | X         | Y         | Z         |
|---|----|----|-----------|-----------|-----------|
|   | 1  | 7  | -0.194317 | -2.995451 | 0.895949  |
|   | 2  | 7  | 0.780438  | -2.317023 | 0.20124   |
|   | 3  | 6  | 0.18044   | -1.280923 | -0.293567 |
|   | 4  | 7  | -1.170296 | -1.262353 | 0.053641  |
|   | 5  | 6  | -1.430862 | -2.407481 | 0.846921  |
|   | 6  | 8  | -2.480894 | -2.756062 | 1.348209  |
|   | 7  | 6  | 0.839341  | -0.297858 | -1.222505 |
|   | 8  | 6  | 2.279072  | 0.000137  | -0.869696 |
|   | 9  | 6  | 2.581739  | 0.782179  | 0.260708  |
|   | 10 | 6  | 3.906867  | 1.069043  | 0.588521  |
|   | 11 | 6  | 4.940772  | 0.576508  | -0.210496 |
|   | 12 | 6  | 4.658904  | -0.195368 | -1.329931 |
|   | 13 | 6  | 3.328956  | -0.475699 | -1.648161 |
|   | 14 | 8  | 1.503108  | 1.224003  | 0.981459  |
|   | 15 | 6  | 1.737016  | 1.977919  | 2.167103  |
|   | 16 | 6  | -2.155514 | -0.272431 | -0.224595 |
|   | 17 | 6  | -1.909875 | 1.062388  | 0.10567   |
| 6 | 18 | 6  | -2.893979 | 1.995823  | -0.174207 |
|   | 19 | 6  | -4.111965 | 1.656098  | -0.740237 |
|   | 20 | 6  | -4.343867 | 0.314624  | -1.039534 |
|   | 21 | 6  | -3.373195 | -0.651916 | -0.790919 |
|   | 22 | 9  | -2.654446 | 3.294052  | 0.136258  |
|   | 23 | 1  | 0.027354  | -3.842938 | 1.3904    |
|   | 24 | 1  | 0.796607  | -0.70846  | -2.23667  |
|   | 25 | 1  | 0.260034  | 0.62571   | -1.238169 |
|   | 26 | 1  | 4.145387  | 1.670058  | 1.455347  |
|   | 27 | 1  | 5.96749   | 0.804013  | 0.053144  |
|   | 28 | 1  | 5.459865  | -0.579714 | -1.949939 |
|   | 29 | 1  | 3.100489  | -1.083466 | -2.51738  |
|   | 30 | 1  | 2.31476   | 1.399985  | 2.895121  |
|   | 31 | 1  | 0.754307  | 2.198868  | 2.580893  |
|   | 32 | 1  | 2.255223  | 2.916582  | 1.946379  |
|   | 33 | 1  | -0.981104 | 1.364638  | 0.571263  |
|   | 34 | 1  | -4.851663 | 2.422891  | -0.931834 |
|   | 35 | 1  | -5.291878 | 0.020995  | -1.474096 |
|   | 36 | 1  | -3.558448 | -1.693635 | -1.014378 |

| N  | CN | AN | X         | Y         | Z         | N  | CN | AN | X         | Y         | Z         |
|----|----|----|-----------|-----------|-----------|----|----|----|-----------|-----------|-----------|
| 1  | 7  |    | -0.080948 | 3.009595  | 0.682785  | 1  | 7  |    | -0.791091 | -4.239624 | 0.353605  |
| 2  | 7  |    | -0.999848 | 2.221284  | 0.02779   | 2  | 7  |    | -1.575701 | -3.604012 | -0.583015 |
| 3  | 6  |    | -0.33442  | 1.174233  | -0.346401 | 3  | 6  |    | -1.059995 | -2.417395 | -0.694099 |
| 4  | 7  |    | 1.001045  | 1.253914  | 0.042964  | 4  | 7  |    | 0.041287  | -2.259362 | 0.138015  |
| 5  | 6  |    | 1.181645  | 2.478577  | 0.729347  | 5  | 6  |    | 0.235366  | -3.467701 | 0.842759  |
| 6  | 8  |    | 2.19829   | 2.922803  | 1.225025  | 6  | 8  |    | 1.091159  | -3.739488 | 1.660483  |
| 7  | 6  |    | -0.909082 | 0.068412  | -1.187964 | 7  | 6  |    | -1.628578 | -1.346703 | -1.570292 |
| 8  | 6  |    | -2.359762 | -0.231366 | -0.887383 | 8  | 6  |    | -2.36101  | -0.251242 | -0.805564 |
| 9  | 6  |    | -2.711721 | -0.887405 | 0.306822  | 9  | 6  |    | -2.010783 | 1.081409  | -0.984281 |
| 10 | 6  |    | -4.047215 | -1.17285  | 0.590808  | 10 | 6  |    | -2.698346 | 2.098686  | -0.308981 |
| 11 | 6  |    | -5.042774 | -0.804455 | -0.316601 | 11 | 6  |    | -3.745716 | 1.776841  | 0.55526   |
| 12 | 6  |    | -4.711982 | -0.15801  | -1.500253 | 12 | 6  |    | -4.091589 | 0.433794  | 0.731036  |
| 13 | 6  |    | -3.371961 | 0.12178   | -1.773642 | 13 | 6  |    | -3.413654 | -0.576211 | 0.062496  |
| 14 | 8  |    | -1.668097 | -1.212665 | 1.133849  | 14 | 8  |    | -2.265475 | 3.369023  | -0.562675 |
| 15 | 6  |    | -1.958648 | -1.808113 | 2.393724  | 15 | 6  |    | -2.92661  | 4.451809  | 0.076755  |
| 16 | 6  |    | 2.040118  | 0.290676  | -0.114496 | 16 | 6  |    | 0.897032  | -1.121279 | 0.255581  |
| 17 | 6  |    | 1.883258  | -1.0032   | 0.386387  | 17 | 6  |    | 1.763397  | -0.79257  | -0.788793 |
| 18 | 6  |    | 2.904217  | -1.937952 | 0.236519  | 18 | 6  |    | 2.598803  | 0.3124    | -0.696913 |
| 19 | 6  |    | 4.076471  | -1.54538  | -0.390107 | 19 | 6  |    | 2.579586  | 1.103883  | 0.472787  |
| 20 | 6  |    | 4.264639  | -0.260353 | -0.874537 | 20 | 6  |    | 1.732877  | 0.746733  | 1.523604  |
| 21 | 6  |    | 3.232187  | 0.662426  | -0.737819 | 21 | 6  |    | 0.890288  | -0.358261 | 1.414697  |
| 22 | 9  |    | 5.075798  | -2.449132 | -0.529132 | 22 | 8  |    | 3.404534  | 2.187255  | 0.480681  |
| 23 | 1  |    | -0.357672 | 3.889578  | 1.083815  | 23 | 6  |    | 3.383562  | 3.050834  | 1.611705  |
| 24 | 1  |    | -0.811639 | 0.354502  | -2.240508 | 24 | 8  |    | 3.367826  | 0.640444  | -1.782317 |
| 25 | 1  |    | -0.305817 | -0.830491 | -1.055036 | 25 | 6  |    | 4.789299  | 0.538023  | -1.615751 |
| 26 | 1  |    | -4.323428 | -1.676952 | 1.506919  | 26 | 1  |    | -0.972883 | -5.195472 | 0.608449  |
| 27 | 1  |    | -6.07808  | -1.029409 | -0.0865   | 27 | 1  |    | -0.837654 | -0.900233 | -2.177447 |
| 28 | 1  |    | -5.48308  | 0.129739  | -2.204718 | 28 | 1  |    | -2.319975 | -1.847483 | -2.253102 |
| 29 | 1  |    | -3.105819 | 0.632223  | -2.693305 | 29 | 1  |    | -1.197995 | 1.362991  | -1.644087 |
| 30 | 1  |    | -2.59313  | -1.156562 | 3.002709  | 30 | 1  |    | -4.291331 | 2.544031  | 1.087679  |
| 31 | 1  |    | -0.999055 | -1.941431 | 2.891179  | 31 | 1  |    | -4.907433 | 0.183491  | 1.400309  |
| 32 | 1  |    | -2.441937 | -2.783104 | 2.27259   | 32 | 1  |    | -3.69325  | -1.61347  | 0.20759   |
| 33 | 1  |    | 0.963644  | -1.274426 | 0.890054  | 33 | 1  |    | -2.423856 | 5.353552  | -0.269258 |
| 34 | 1  |    | 2.804763  | -2.949365 | 0.609705  | 34 | 1  |    | -3.984603 | 4.49703   | -0.203698 |
| 35 | 1  |    | 5.200872  | 0.005992  | -1.348293 | 35 | 1  |    | -2.842021 | 4.385269  | 1.167082  |
| 36 | 1  |    | 3.355084  | 1.675115  | -1.098609 | 36 | 1  |    | 1.803721  | -1.393433 | -1.689319 |
|    |    |    |           |           |           | 37 | 1  |    | 1.708583  | 1.335836  | 2.430066  |
|    |    |    |           |           |           | 38 | 1  |    | 0.229621  | -0.621684 | 2.230484  |
|    |    |    |           |           |           | 39 | 1  |    | 4.09078   | 3.847598  | 1.387846  |
|    |    |    |           |           |           | 40 | 1  |    | 2.38812   | 3.480444  | 1.763697  |
|    |    |    |           |           |           | 41 | 1  |    | 3.700843  | 2.527664  | 2.519831  |
|    |    |    |           |           |           | 42 | 1  |    | 5.221048  | 0.78674   | -2.58445  |
|    |    |    |           |           |           | 43 | 1  |    | 5.150366  | 1.237315  | -0.859873 |
|    |    |    |           |           |           | 44 | 1  |    | 5.068535  | -0.485368 | -1.343448 |

| N | CN | AN | X         | Y         | Z         |
|---|----|----|-----------|-----------|-----------|
|   | 1  | 7  | -0.526311 | -2.831163 | 0.890121  |
|   | 2  | 7  | 0.43946   | -1.917157 | 0.534135  |
|   | 3  | 6  | -0.221249 | -0.868243 | 0.156483  |
|   | 4  | 7  | -1.596181 | -1.069945 | 0.249567  |
|   | 5  | 6  | -1.813586 | -2.38399  | 0.723158  |
|   | 6  | 8  | -2.868274 | -2.951177 | 0.92549   |
|   | 7  | 6  | -2.646541 | -0.160077 | -0.080892 |
|   | 8  | 6  | -2.795005 | 1.023418  | 0.641941  |
|   | 9  | 6  | -4.684178 | 1.612274  | -0.71671  |
|   | 10 | 6  | -3.528494 | -0.473603 | -1.113282 |
|   | 11 | 6  | -3.811991 | 1.929885  | 0.3299    |
|   | 12 | 6  | -4.549319 | 0.419862  | -1.424144 |
|   | 13 | 6  | -3.988876 | 3.195914  | 1.133266  |
|   | 14 | 6  | 0.390028  | 0.407231  | -0.348575 |
|   | 15 | 6  | 1.880653  | 0.314206  | -0.597811 |
|   | 16 | 6  | 2.779366  | 0.702056  | 0.388116  |
|   | 17 | 6  | 4.159983  | 0.618446  | 0.171557  |
|   | 18 | 6  | 4.645654  | 0.145076  | -1.048598 |
|   | 19 | 6  | 3.736925  | -0.239154 | -2.037751 |
| 9 | 20 | 6  | 2.367778  | -0.157639 | -1.823578 |
|   | 21 | 8  | 4.944328  | 1.026147  | 1.212679  |
|   | 22 | 6  | 6.355901  | 0.948362  | 1.070854  |
|   | 23 | 1  | -0.265459 | -3.751743 | 1.200396  |
|   | 24 | 1  | -2.119044 | 1.23112   | 1.46437   |
|   | 25 | 1  | -5.480431 | 2.302589  | -0.975198 |
|   | 26 | 1  | -3.416498 | -1.404992 | -1.653411 |
|   | 27 | 1  | -5.240552 | 0.186059  | -2.225747 |
|   | 28 | 1  | -4.408789 | 3.998351  | 0.52261   |
|   | 29 | 1  | -3.039727 | 3.544495  | 1.546408  |
|   | 30 | 1  | -4.672008 | 3.031663  | 1.973551  |
|   | 31 | 1  | -0.128342 | 0.691553  | -1.270532 |
|   | 32 | 1  | 0.184297  | 1.209158  | 0.367533  |
|   | 33 | 1  | 2.433202  | 1.069643  | 1.347528  |
|   | 34 | 1  | 5.707524  | 0.074118  | -1.241003 |
|   | 35 | 1  | 4.113799  | -0.604202 | -2.986765 |
|   | 36 | 1  | 1.676276  | -0.462849 | -2.601067 |
|   | 37 | 1  | 6.684411  | -0.082743 | 0.900933  |
|   | 38 | 1  | 6.769625  | 1.307571  | 2.011798  |
|   | 39 | 1  | 6.712206  | 1.584152  | 0.252888  |

| N  | CN | AN | X         | Y         | Z         |
|----|----|----|-----------|-----------|-----------|
|    | 1  | 7  | 0.825115  | 2.745039  | 0.669181  |
|    | 2  | 7  | -0.206934 | 1.87874   | 0.384081  |
|    | 3  | 6  | 0.369541  | 0.759289  | 0.083735  |
|    | 4  | 7  | 1.758565  | 0.869258  | 0.156851  |
|    | 5  | 6  | 2.074344  | 2.196471  | 0.536827  |
|    | 6  | 8  | 3.170525  | 2.694115  | 0.692873  |
|    | 7  | 6  | -0.331294 | -0.505688 | -0.316283 |
|    | 8  | 6  | -1.80984  | -0.327524 | -0.590806 |
|    | 9  | 6  | -2.743333 | -0.636785 | 0.390268  |
|    | 10 | 6  | -4.113829 | -0.478603 | 0.149313  |
|    | 11 | 6  | -4.553146 | -0.007719 | -1.089046 |
|    | 12 | 6  | -3.609164 | 0.298498  | -2.072715 |
|    | 13 | 6  | -2.250729 | 0.14204   | -1.835134 |
|    | 14 | 8  | -4.935565 | -0.81515  | 1.186669  |
|    | 15 | 6  | -6.338377 | -0.665562 | 1.018231  |
|    | 16 | 6  | 2.739792  | -0.125052 | -0.090913 |
|    | 17 | 6  | 2.83704   | -1.254522 | 0.721772  |
|    | 18 | 6  | 3.795394  | -2.232244 | 0.513923  |
| 10 | 19 | 6  | 4.706643  | -2.067781 | -0.526509 |
|    | 20 | 6  | 4.646506  | -0.937263 | -1.340147 |
|    | 21 | 6  | 3.666598  | 0.026489  | -1.124158 |
|    | 22 | 9  | 1.968347  | -1.399267 | 1.748768  |
|    | 23 | 1  | 0.632409  | 3.699815  | 0.920543  |
|    | 24 | 1  | 0.167568  | -0.904514 | -1.206824 |
|    | 25 | 1  | -0.185076 | -1.249063 | 0.473001  |
|    | 26 | 1  | -2.432668 | -1.00096  | 1.362955  |
|    | 27 | 1  | -5.60613  | 0.120141  | -1.299992 |
|    | 28 | 1  | -3.950301 | 0.661782  | -3.035832 |
|    | 29 | 1  | -1.53149  | 0.387609  | -2.608627 |
|    | 30 | 1  | -6.786185 | -0.981199 | 1.959177  |
|    | 31 | 1  | -6.608434 | 0.3775    | 0.820575  |
|    | 32 | 1  | -6.714374 | -1.29969  | 0.207832  |
|    | 33 | 1  | 3.823891  | -3.092571 | 1.170815  |
|    | 34 | 1  | 5.465955  | -2.822085 | -0.695272 |
|    | 35 | 1  | 5.361607  | -0.804797 | -2.142768 |
|    | 36 | 1  | 3.614313  | 0.914193  | -1.741776 |



| N  | CN | AN        | X         | Y         | Z |
|----|----|-----------|-----------|-----------|---|
| 1  | 7  | 0.870562  | 2.79466   | 0.307826  |   |
| 2  | 7  | -0.145565 | 1.864504  | 0.310004  |   |
| 3  | 6  | 0.442328  | 0.726128  | 0.12388   |   |
| 4  | 7  | 1.822643  | 0.885017  | -0.0076   |   |
| 5  | 6  | 2.118223  | 2.265698  | 0.103219  |   |
| 6  | 8  | 3.199691  | 2.812211  | 0.028417  |   |
| 7  | 6  | -0.242631 | -0.606057 | 0.024947  |   |
| 8  | 6  | -1.752886 | -0.526983 | 0.049155  |   |
| 9  | 6  | -2.45172  | -0.523136 | 1.262843  |   |
| 10 | 6  | -3.835405 | -0.448759 | 1.295086  |   |
| 11 | 6  | -4.562699 | -0.376659 | 0.10104   |   |
| 12 | 6  | -3.883992 | -0.383367 | -1.119026 |   |
| 13 | 6  | -2.489417 | -0.457991 | -1.130019 |   |
| 14 | 8  | -5.920145 | -0.308372 | 0.233664  |   |
| 15 | 6  | -6.713597 | -0.219866 | -0.941395 |   |
| 16 | 6  | 2.81321   | -0.107953 | -0.221244 |   |
| 17 | 6  | 3.060217  | -1.094637 | 0.733445  |   |
| 18 | 6  | 4.031169  | -2.06594  | 0.556076  |   |
| 19 | 6  | 4.803222  | -2.039385 | -0.602758 |   |
| 20 | 6  | 4.594217  | -1.049862 | -1.562375 |   |
| 21 | 6  | 3.602978  | -0.092222 | -1.372746 |   |
| 22 | 9  | 2.32853   | -1.103727 | 1.872152  |   |
| 23 | 1  | 0.665087  | 3.772162  | 0.42677   |   |
| 24 | 1  | 0.093928  | -1.093792 | -0.896859 |   |
| 25 | 1  | 0.111223  | -1.236598 | 0.84645   |   |
| 26 | 1  | -1.903543 | -0.575367 | 2.197808  |   |
| 27 | 1  | -4.37619  | -0.446266 | 2.233789  |   |
| 28 | 1  | -4.419066 | -0.333404 | -2.05772  |   |
| 29 | 1  | -1.975347 | -0.460777 | -2.086103 |   |
| 30 | 1  | -7.746367 | -0.169788 | -0.600164 |   |
| 31 | 1  | -6.478026 | 0.682426  | -1.516356 |   |
| 32 | 1  | -6.585553 | -1.101874 | -1.578599 |   |
| 33 | 1  | 4.177987  | -2.812896 | 1.326139  |   |
| 34 | 1  | 5.571233  | -2.789369 | -0.749987 |   |
| 35 | 1  | 5.201918  | -1.022663 | -2.45853  |   |
| 36 | 1  | 3.436788  | 0.687709  | -2.105017 |   |

11

| N  | CN | AN        | X         | Y         | Z |
|----|----|-----------|-----------|-----------|---|
| 1  | 7  | -0.637134 | 2.907703  | -0.515242 |   |
| 2  | 7  | 0.320628  | 1.920062  | -0.543905 |   |
| 3  | 6  | -0.322418 | 0.822351  | -0.300155 |   |
| 4  | 7  | -1.682733 | 1.064545  | -0.102705 |   |
| 5  | 6  | -1.899677 | 2.459049  | -0.223657 |   |
| 6  | 8  | -2.938572 | 3.074782  | -0.100298 |   |
| 7  | 6  | 0.30287   | -0.540938 | -0.200373 |   |
| 8  | 6  | 1.815264  | -0.522209 | -0.162539 |   |
| 9  | 6  | 2.565559  | -0.525509 | -1.344775 |   |
| 10 | 6  | 3.951161  | -0.505799 | -1.316737 |   |
| 11 | 6  | 4.628241  | -0.482896 | -0.091543 |   |
| 12 | 6  | 3.897147  | -0.483731 | 1.098116  |   |
| 13 | 6  | 2.501789  | -0.503357 | 1.048417  |   |
| 14 | 8  | 5.991213  | -0.466015 | -0.164695 |   |
| 15 | 6  | 6.736302  | -0.431999 | 1.04474   |   |
| 16 | 6  | -2.71707  | 0.131503  | 0.192041  |   |
| 17 | 6  | -2.95805  | -0.935827 | -0.675134 |   |
| 18 | 6  | -3.969281 | -1.826951 | -0.354872 |   |
| 19 | 6  | -4.762872 | -1.684708 | 0.771659  |   |
| 20 | 6  | -4.522349 | -0.597714 | 1.610389  |   |
| 21 | 6  | -3.502665 | 0.30834   | 1.332193  |   |
| 22 | 9  | -4.195318 | -2.868557 | -1.190535 |   |
| 23 | 1  | -0.378561 | 3.870713  | -0.648913 |   |
| 24 | 1  | -0.091271 | -1.031284 | 0.69588   |   |
| 25 | 1  | -0.035707 | -1.15198  | -1.043959 |   |
| 26 | 1  | 2.057421  | -0.538994 | -2.303452 |   |
| 27 | 1  | 4.531788  | -0.508809 | -2.231288 |   |
| 28 | 1  | 4.392384  | -0.471748 | 2.059615  |   |
| 29 | 1  | 1.94715   | -0.503307 | 1.98154   |   |
| 30 | 1  | 7.783877  | -0.416609 | 0.74845   |   |
| 31 | 1  | 6.511568  | 0.467761  | 1.627822  |   |
| 32 | 1  | 6.546445  | -1.320466 | 1.656927  |   |
| 33 | 1  | -2.392171 | -1.06645  | -1.587704 |   |
| 34 | 1  | -5.546551 | -2.403417 | 0.974403  |   |
| 35 | 1  | -5.135704 | -0.458449 | 2.492499  |   |
| 36 | 1  | -3.322953 | 1.156134  | 1.9793    |   |

12

| N  | CN | AN | X         | Y         | Z         |
|----|----|----|-----------|-----------|-----------|
|    | 1  | 7  | 1.204598  | 2.77444   | 1.093316  |
|    | 2  | 7  | 0.208535  | 1.876799  | 0.784868  |
|    | 3  | 6  | 0.826549  | 0.834645  | 0.327362  |
|    | 4  | 7  | 2.208986  | 1.027184  | 0.319856  |
|    | 5  | 6  | 2.470731  | 2.329282  | 0.812086  |
|    | 6  | 8  | 3.54195   | 2.885046  | 0.943956  |
|    | 7  | 6  | 3.226888  | 0.131819  | -0.115227 |
|    | 8  | 6  | 3.33972   | -1.130291 | 0.470968  |
|    | 9  | 6  | 4.3376    | -1.977924 | 0.018107  |
|    | 10 | 6  | 5.238846  | -1.612766 | -0.968588 |
|    | 11 | 6  | 5.12473   | -0.338649 | -1.522158 |
|    | 12 | 6  | 4.122957  | 0.534245  | -1.106823 |
|    | 13 | 9  | 4.439478  | -3.206576 | 0.578996  |
|    | 14 | 6  | 0.15914   | -0.414394 | -0.175734 |
|    | 15 | 6  | -1.342131 | -0.292158 | -0.320245 |
|    | 16 | 6  | -2.188708 | -0.597926 | 0.749479  |
|    | 17 | 6  | -3.568676 | -0.486979 | 0.641524  |
|    | 18 | 6  | -4.139701 | -0.045998 | -0.571231 |
|    | 19 | 6  | -3.300616 | 0.245266  | -1.646768 |
| 13 | 20 | 6  | -1.916292 | 0.12119   | -1.518115 |
|    | 21 | 8  | -5.499119 | 0.069616  | -0.594935 |
|    | 22 | 6  | -6.114946 | 0.594731  | -1.763866 |
|    | 23 | 8  | -4.335718 | -0.736186 | 1.75137   |
|    | 24 | 6  | -5.203658 | -1.873669 | 1.683684  |
|    | 25 | 1  | 0.974298  | 3.685713  | 1.452041  |
|    | 26 | 1  | 2.68586   | -1.445958 | 1.272862  |
|    | 27 | 1  | 6.006734  | -2.308192 | -1.28248  |
|    | 28 | 1  | 5.823777  | -0.025213 | -2.288207 |
|    | 29 | 1  | 4.040572  | 1.525481  | -1.531753 |
|    | 30 | 1  | 0.609588  | -0.676662 | -1.138888 |
|    | 31 | 1  | 0.397299  | -1.244036 | 0.497944  |
|    | 32 | 1  | -1.787085 | -0.918176 | 1.704636  |
|    | 33 | 1  | -3.714596 | 0.578948  | -2.588782 |
|    | 34 | 1  | -1.286488 | 0.359775  | -2.368706 |
|    | 35 | 1  | -5.946764 | -0.052126 | -2.631837 |
|    | 36 | 1  | -5.752358 | 1.604199  | -1.984356 |
|    | 37 | 1  | -7.180824 | 0.633816  | -1.545115 |
|    | 38 | 1  | -5.952785 | -1.756334 | 0.898354  |
|    | 39 | 1  | -5.695265 | -1.933712 | 2.6542    |
|    | 40 | 1  | -4.623596 | -2.787643 | 1.512979  |

| N  | CN | AN | X         | Y         | Z         |
|----|----|----|-----------|-----------|-----------|
|    | 1  | 7  | 1.419556  | 2.565569  | 1.212283  |
|    | 2  | 7  | 0.376193  | 1.752142  | 0.829129  |
|    | 3  | 6  | 0.938309  | 0.72006   | 0.286481  |
|    | 4  | 7  | 2.328913  | 0.837415  | 0.29641   |
|    | 5  | 6  | 2.660783  | 2.073341  | 0.903275  |
|    | 6  | 8  | 3.762107  | 2.550749  | 1.08519   |
|    | 7  | 6  | 3.297506  | -0.07013  | -0.204261 |
|    | 8  | 6  | 3.453135  | -1.33712  | 0.357926  |
|    | 9  | 6  | 4.399376  | -2.237311 | -0.102737 |
|    | 10 | 6  | 5.239228  | -1.853091 | -1.145226 |
|    | 11 | 6  | 5.121385  | -0.583764 | -1.709786 |
|    | 12 | 6  | 4.154233  | 0.300562  | -1.242711 |
|    | 13 | 9  | 2.654502  | -1.699216 | 1.388353  |
|    | 14 | 6  | 0.218797  | -0.453729 | -0.311977 |
|    | 15 | 6  | -1.279951 | -0.271906 | -0.40959  |
|    | 16 | 6  | -2.113853 | -0.653545 | 0.645856  |
|    | 17 | 6  | -3.491192 | -0.488752 | 0.582041  |
|    | 18 | 6  | -4.072284 | 0.086969  | -0.56771  |
|    | 19 | 6  | -3.246702 | 0.455339  | -1.629817 |
| 14 | 20 | 6  | -1.864997 | 0.275114  | -1.547043 |
|    | 21 | 8  | -5.42773  | 0.247256  | -0.547514 |
|    | 22 | 6  | -6.048648 | 0.905602  | -1.643769 |
|    | 23 | 8  | -4.244759 | -0.821849 | 1.679531  |
|    | 24 | 6  | -5.14616  | -1.923111 | 1.51996   |
|    | 25 | 1  | 1.237857  | 3.448963  | 1.657823  |
|    | 26 | 1  | 4.474633  | -3.210682 | 0.365639  |
|    | 27 | 1  | 5.988639  | -2.545481 | -1.509908 |
|    | 28 | 1  | 5.781799  | -0.281354 | -2.513236 |
|    | 29 | 1  | 4.05838   | 1.29284   | -1.665045 |
|    | 30 | 1  | 0.638788  | -0.638385 | -1.307049 |
|    | 31 | 1  | 0.45049   | -1.342156 | 0.28377   |
|    | 32 | 1  | -1.702089 | -1.078041 | 1.554884  |
|    | 33 | 1  | -3.668732 | 0.892632  | -2.524682 |
|    | 34 | 1  | -1.245048 | 0.576919  | -2.384728 |
|    | 35 | 1  | -7.107844 | 0.957782  | -1.396885 |
|    | 36 | 1  | -5.655593 | 1.919556  | -1.772703 |
|    | 37 | 1  | -5.921184 | 0.343028  | 2.488551  |
|    | 38 | 1  | -5.625748 | -2.061374 | 2.488551  |
|    | 39 | 1  | -5.902671 | -1.711045 | 0.761805  |
|    | 40 | 1  | -4.595558 | -2.832563 | 1.253875  |

| N  | CN | AN        | X         | Y         | Z |
|----|----|-----------|-----------|-----------|---|
| 1  | 7  | -1.200583 | -2.725267 | 1.278596  |   |
| 2  | 7  | -0.199992 | -1.881655 | 0.851439  |   |
| 3  | 6  | -0.819799 | -0.885822 | 0.300614  |   |
| 4  | 7  | -2.201659 | -1.054139 | 0.350657  |   |
| 5  | 6  | -2.468821 | -2.286935 | 0.988669  |   |
| 6  | 8  | -3.543791 | -2.805368 | 1.214249  |   |
| 7  | 6  | -3.215606 | -0.181805 | -0.150718 |   |
| 8  | 6  | -3.383466 | 1.084233  | 0.411147  |   |
| 9  | 6  | -5.182918 | 1.519613  | -1.116073 |   |
| 10 | 6  | -4.043848 | -0.611417 | -1.185234 |   |
| 11 | 6  | -4.364403 | 1.955867  | -0.068174 |   |
| 12 | 6  | -5.030195 | 0.247699  | -1.661938 |   |
| 13 | 6  | -4.564059 | 3.315404  | 0.557326  |   |
| 14 | 6  | -0.158267 | 0.293431  | -0.354143 |   |
| 15 | 6  | 1.34999   | 0.195632  | -0.41781  |   |
| 16 | 6  | 2.141166  | 0.709331  | 0.614006  |   |
| 17 | 6  | 3.527009  | 0.624786  | 0.582454  |   |
| 18 | 6  | 4.161735  | -0.002987 | -0.509986 |   |
| 19 | 6  | 3.378271  | -0.503259 | -1.550055 |   |
| 20 | 6  | 1.987174  | -0.402129 | -1.500421 |   |
| 21 | 8  | 5.523873  | -0.079358 | -0.459781 |   |
| 22 | 6  | 6.201761  | -0.778345 | -1.495588 |   |
| 23 | 8  | 4.236804  | 1.088371  | 1.661789  |   |
| 24 | 6  | 5.087377  | 2.216545  | 1.427931  |   |
| 25 | 1  | -0.974129 | -3.592282 | 1.735497  |   |
| 26 | 1  | -2.750762 | 1.384141  | 1.23953   |   |
| 27 | 1  | -5.951737 | 2.180374  | -1.503338 |   |
| 28 | 1  | -3.919053 | -1.604083 | -1.598691 |   |
| 29 | 1  | -5.680226 | -0.076512 | -2.466564 |   |
| 30 | 1  | -4.836387 | 4.061485  | -0.193076 |   |
| 31 | 1  | -3.660821 | 3.659284  | 1.065634  |   |
| 32 | 1  | -5.369521 | 3.288862  | 1.298961  |   |
| 33 | 1  | -0.573021 | 0.397818  | -1.362894 |   |
| 34 | 1  | -0.448918 | 1.204736  | 0.178175  |   |
| 35 | 1  | 1.689689  | 1.178295  | 1.481531  |   |
| 36 | 1  | 3.841624  | -0.983571 | -2.401371 |   |
| 37 | 1  | 1.401579  | -0.807259 | -2.318798 |   |
| 38 | 1  | 6.056944  | -0.295015 | -2.468031 |   |
| 39 | 1  | 5.871984  | -1.820962 | -1.553253 |   |
| 40 | 1  | 7.257757  | -0.747682 | -1.231954 |   |
| 41 | 1  | 5.873698  | 1.979431  | 0.708788  |   |
| 42 | 1  | 5.532608  | 2.461466  | 2.391829  |   |
| 43 | 1  | 4.500631  | 3.070689  | 1.071065  |   |

15

| N  | CN | AN        | X         | Y         | Z |
|----|----|-----------|-----------|-----------|---|
| 1  | 7  | 0.219427  | -3.116421 | -0.115634 |   |
| 2  | 7  | -1.014588 | -2.527652 | -0.014634 |   |
| 3  | 6  | -0.782602 | -1.247004 | -0.014549 |   |
| 4  | 7  | 0.586373  | -0.98731  | -0.102355 |   |
| 5  | 6  | 1.265227  | -2.227688 | -0.171801 |   |
| 6  | 8  | 2.455793  | -2.426752 | -0.276719 |   |
| 7  | 6  | -1.852635 | -0.24309  | 0.078712  |   |
| 8  | 6  | -3.094118 | -0.526489 | -0.509317 |   |
| 9  | 6  | -4.142594 | 0.381092  | -0.408541 |   |
| 10 | 6  | -3.967707 | 1.583329  | 0.277069  |   |
| 11 | 6  | -2.73848  | 1.868684  | 0.867888  |   |
| 12 | 6  | -1.685222 | 0.963142  | 0.771612  |   |
| 13 | 6  | 1.263613  | 0.251241  | -0.269424 |   |
| 14 | 6  | 2.113659  | 0.721236  | 0.730948  |   |
| 15 | 6  | 2.822742  | 1.903663  | 0.590999  |   |
| 16 | 6  | 2.672502  | 2.644478  | -0.578735 |   |
| 17 | 6  | 1.824359  | 2.197291  | -1.591204 |   |
| 18 | 6  | 1.131653  | 1.000142  | -1.439027 |   |
| 19 | 9  | 2.231156  | 0.018336  | 1.873485  |   |
| 20 | 1  | 0.308302  | -4.11866  | -0.104506 |   |
| 21 | 1  | -3.223692 | -1.461391 | -1.04006  |   |
| 22 | 1  | -5.096823 | 0.151566  | -0.86898  |   |
| 23 | 1  | -4.78511  | 2.291411  | 0.352354  |   |
| 24 | 1  | -2.598529 | 2.795397  | 1.412551  |   |
| 25 | 1  | -0.742741 | 1.190391  | 1.252504  |   |
| 26 | 1  | 3.475313  | 2.225227  | 1.393004  |   |
| 27 | 1  | 3.222565  | 3.570409  | -0.697982 |   |
| 28 | 1  | 1.711498  | 2.772025  | -2.502256 |   |
| 29 | 1  | 0.48162   | 0.632132  | -2.223658 |   |

| N  | CN | AN | X         | Y         | Z         |
|----|----|----|-----------|-----------|-----------|
|    | 1  | 7  | -0.245921 | -3.292387 | 0.330267  |
|    | 2  | 7  | -1.373521 | -2.514604 | 0.28464   |
|    | 3  | 6  | -0.944927 | -1.306941 | 0.056428  |
|    | 4  | 7  | 0.446488  | -1.281017 | -0.064841 |
|    | 5  | 6  | 0.92084   | -2.6065   | 0.102031  |
|    | 6  | 8  | 2.063798  | -3.010194 | 0.06251   |
|    | 7  | 6  | -1.854089 | -0.162236 | -0.106452 |
|    | 8  | 6  | -1.607924 | 0.850928  | -1.04256  |
|    | 9  | 6  | -2.519403 | 1.890479  | -1.2047   |
|    | 10 | 6  | -3.6821   | 1.932309  | -0.437281 |
|    | 11 | 6  | -3.93462  | 0.923737  | 0.492277  |
|    | 12 | 6  | -3.02788  | -0.117633 | 0.658783  |
|    | 13 | 6  | 1.325135  | -0.159836 | -0.126048 |
|    | 14 | 6  | 1.196768  | 0.873855  | 0.803597  |
| 17 | 15 | 6  | 2.074351  | 1.941426  | 0.71796   |
|    | 16 | 6  | 3.081293  | 2.01021   | -0.231974 |
|    | 17 | 6  | 3.204847  | 0.955908  | -1.134625 |
|    | 18 | 6  | 2.33072   | -0.127473 | -1.092486 |
|    | 19 | 9  | 1.945967  | 2.951809  | 1.61059   |
|    | 20 | 1  | -0.318604 | -4.288584 | 0.453212  |
|    | 21 | 1  | -0.714492 | 0.82252   | -1.653549 |
|    | 22 | 1  | -2.321667 | 2.666544  | -1.935162 |
|    | 23 | 1  | -4.387682 | 2.745516  | -0.563651 |
|    | 24 | 1  | -4.837381 | 0.950219  | 1.09178   |
|    | 25 | 1  | -3.219164 | -0.904865 | 1.37742   |
|    | 26 | 1  | 0.437978  | 0.85623   | 1.574413  |
|    | 27 | 1  | 3.746873  | 2.863695  | -0.252156 |
|    | 28 | 1  | 3.990126  | 0.980449  | -1.880573 |
|    | 29 | 1  | 2.432538  | -0.949788 | -1.787277 |

| N  | CN | AN | X         | Y         | Z         |
|----|----|----|-----------|-----------|-----------|
|    | 1  | 7  | 0.96659   | 3.204765  | 0.092035  |
|    | 2  | 7  | 1.935864  | 2.235604  | 0.078777  |
|    | 3  | 6  | 1.288181  | 1.109285  | -0.006384 |
|    | 4  | 7  | -0.090099 | 1.323634  | -0.062155 |
|    | 5  | 6  | -0.31394  | 2.72076   | -0.010181 |
|    | 6  | 8  | -1.370276 | 3.317018  | -0.040447 |
|    | 7  | 6  | 1.970078  | -0.191851 | -0.083214 |
|    | 8  | 6  | 1.490545  | -1.232456 | -0.889876 |
|    | 9  | 6  | 2.192719  | -2.431314 | -0.977384 |
|    | 10 | 6  | 3.376803  | -2.60679  | -0.263382 |
|    | 11 | 6  | 3.861322  | -1.572732 | 0.537413  |
|    | 12 | 6  | 3.16436   | -0.372632 | 0.628759  |
|    | 13 | 6  | -1.155324 | 0.377718  | 0.021983  |
|    | 14 | 6  | -1.19295  | -0.54943  | 1.064527  |
| 18 | 15 | 6  | -2.238391 | -1.464028 | 1.146823  |
|    | 16 | 6  | -3.241644 | -1.412551 | 0.191387  |
|    | 17 | 6  | -3.238591 | -0.485232 | -0.83883  |
|    | 18 | 6  | -2.18062  | 0.415146  | -0.923489 |
|    | 19 | 9  | -4.263789 | -2.296883 | 0.271242  |
|    | 20 | 1  | 1.219653  | 4.1786    | 0.110836  |
|    | 21 | 1  | 0.579279  | -1.104207 | -1.460124 |
|    | 22 | 1  | 1.815569  | -3.22721  | -1.6093   |
|    | 23 | 1  | 3.919493  | -3.542706 | -0.331903 |
|    | 24 | 1  | 4.782085  | -1.702003 | 1.094756  |
|    | 25 | 1  | 3.53665   | 0.434996  | 1.246659  |
|    | 26 | 1  | -0.40628  | -0.558777 | 1.808465  |
|    | 27 | 1  | -2.286746 | -2.196909 | 1.942051  |
|    | 28 | 1  | -4.048975 | -0.472816 | -1.556466 |
|    | 29 | 1  | -2.15619  | 1.15546   | -1.712092 |
